# Supplementary material for: Genome-Wide Identification and Characterization of the Phytochrome Gene Family in Peanut
Source: MDPI journal article supplement (doi:10.3390/genes14071478), 2023-07-20
Supplement: s1 [file s1]

Heatmap showing the correlation of gene expression between 12 samples. The samples are grouped into three clusters: Ctrl (ctrl\_1 to ctrl\_6), Dark (dark\_1 to dark\_6), and Arahy (Arahy.HS5Z9Z to Arahy.T2CQE4). The color scale ranges from -2.50 (blue) to 2.00 (red).

| Sample       | ctrl_1 | ctrl_2 | ctrl_3 | ctrl_4 | ctrl_5 | ctrl_6 | dark_1 | dark_2 | dark_3 | dark_4 | dark_5 | dark_6 |
|--------------|--------|--------|--------|--------|--------|--------|--------|--------|--------|--------|--------|--------|
| Arahy.HS5Z9Z | 0.5    | 0.5    | 1.5    | 2.0    | 0.5    | 0.5    | 0.5    | 0.5    | 0.5    | 1.5    | 0.5    | 1.5    |
| Arahy.NNA8KD | 0.0    | 0.0    | 1.0    | 1.0    | 1.0    | 0.0    | 1.5    | 1.0    | 2.0    | 0.0    | 1.0    | 1.0    |
| Arahy.D04KR2 | 0.0    | 0.5    | 1.5    | 0.0    | 0.0    | 0.0    | 0.5    | 0.5    | 0.5    | 1.5    | 0.5    | 0.5    |
| Arahy.7E2TSQ | 0.5    | 0.5    | 0.5    | 0.5    | 0.0    | 0.0    | 1.5    | 0.5    | 0.5    | 1.5    | 1.5    | 0.0    |
| Arahy.PM8GQZ | 0.0    | 0.5    | 0.5    | 0.5    | 2.0    | 0.0    | 0.5    | 0.5    | 0.5    | 1.5    | 1.5    | 0.5    |
| Arahy.F3Y113 | 0.5    | 0.5    | 0.5    | 0.5    | 0.5    | 0.5    | 0.5    | 0.5    | 0.5    | 0.5    | 0.5    | 0.5    |
| Arahy.A3SZXW | 0.5    | 0.5    | 1.5    | 1.5    | 2.0    | 0.5    | 0.5    | 0.5    | 1.5    | 1.5    | 1.5    | 0.5    |
| Arahy.T2CQE4 | 0.0    | 0.5    | 1.5    | 1.5    | 2.0    | 0.5    | 0.5    | 0.5    | 1.5    | 1.5    | 1.5    | 0.5    |

(A)

Aradu.T66QJ  
Arahy.A3SZXW  
Arahy.T2CQF4  
AtPHYB  
AtPHYD  
AtPHYE  
Arahy.F3Y113  
Aradu.H9LWJ  
Arahy.PM8GQZ  
AtPHYC  
AtPHYA  
Arahy.D04KR2  
Aradu.E3ZED  
Arahy.7E2TSQ  
Aradu.G6IAK  
Arahy.NNA8KD  
Arahy.HS5Z9Z

(B)

Aradu.G6IAK  
Aradu.E3ZED  
Aradu.H9LWJ  
Aradu.T66QJ

ctrl drought

(C)

Aradu.G6IAK  
Aradu.E3ZED  
Aradu.H9LWJ  
Aradu.T66QJ

ctrl\_1 ctrl\_2 3day\_1 3day\_2 6day\_1 6day\_2 9day\_1 9day\_2

**Supplementary Figure S2.** Expression profiling of *PHY* genes in wild peanut under abiotic stress. **(A)** Phylogenetic analysis of *PHY* genes from *Arachis duranensis* (AA) *Arachis hypogaea* (AABB) and *Arabidopsis thaliana*. **(B)** Expression profiling of *PHY* genes under drought treatment. **(C)** Expression profiling of *PHY* genes under nematode infection. Transcriptome data for *Arachis duranensis* under drought and nematode treatment were obtained from Peanutbase. The square color scale of heatmap indicates FPKM values following row normalization, with maximal and minimal expression denoted by red and blue, respectively. The circular color scale indicates raw FPKM values, where the area subtended by each circle is directly proportional to the expression level.

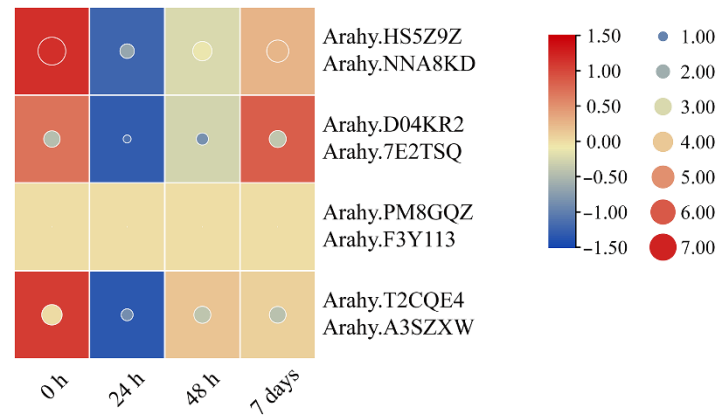

**Supplementary Figure S3.** Expression profiling of *PHY* genes in cultivated peanut under drought treatment. Young peanut seedlings were treated with 15% PEG6000 solution for 24h, 48h and 7days. The square color scale of heatmap indicates RPKM values following row normalization, with maximal and minimal expression denoted by red and blue, respectively. The circular color scale indicates raw RPKM values, where the area subtended by each circle is directly proportional to the expression level.
